# Supplementary material
Source: PubMed Central journal article supplement (PMC3700537)

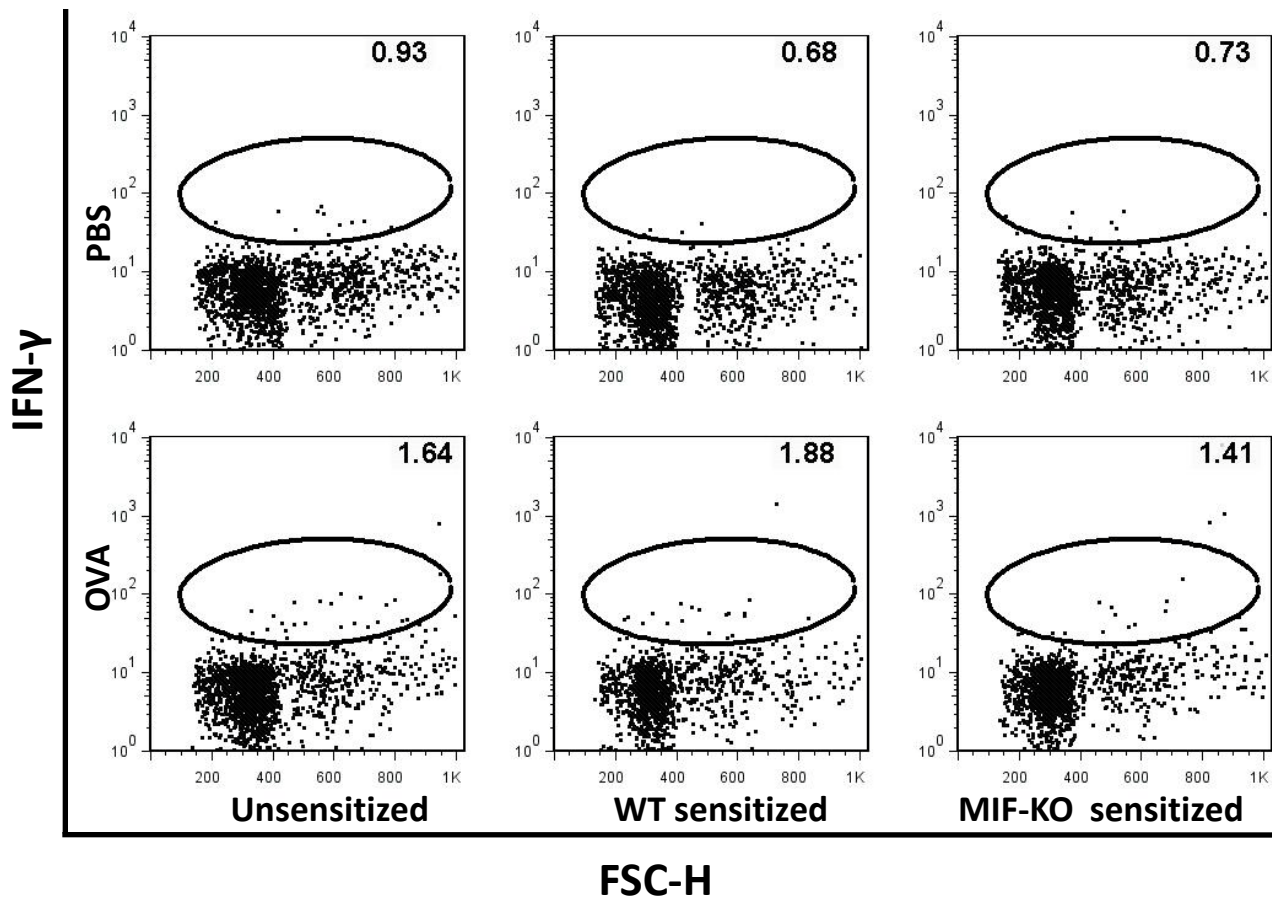

**Fig. 1. Supplemental**  
Das *et al.*

Supplement: NIHMS479979-supplement-Figure_1_Supplemental.pdf [file NIHMS479979-supplement-Figure_1_Supplemental.pdf]
